# Supplementary material
Source: PubMed Central journal article supplement (PMC1142410)

# Suppl. Fig. 1

insulin (min)

0

2

5

30

Endogenous  
PLD1

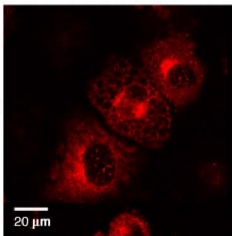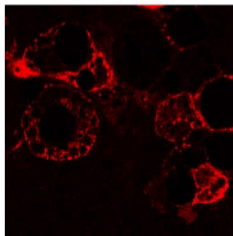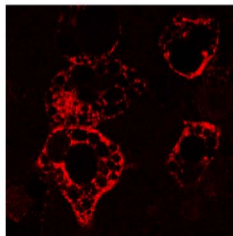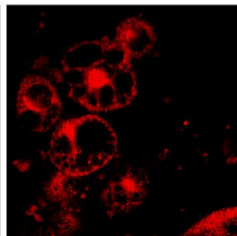

# Suppl. Fig. 2

**A**

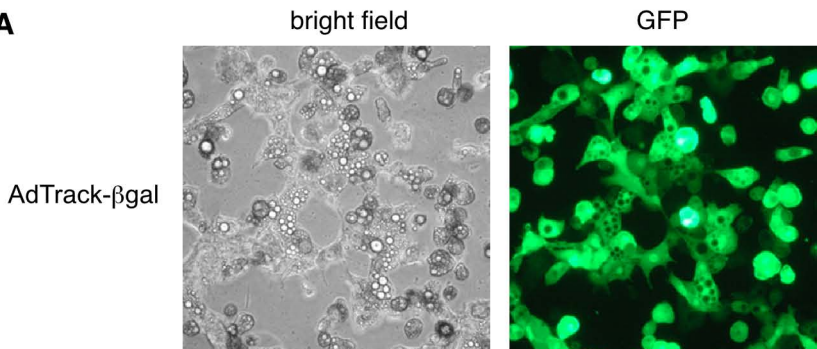

**B**

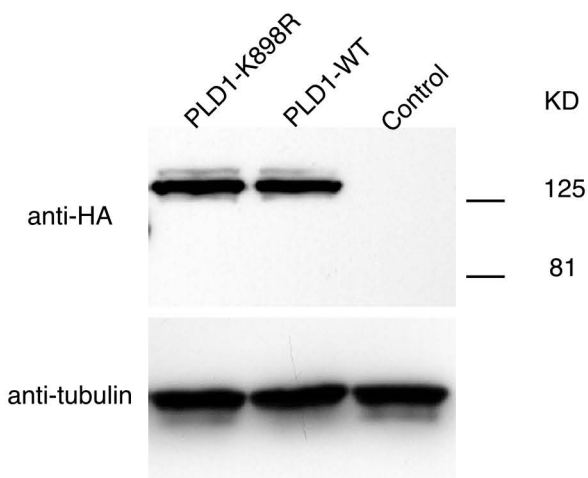

**C**

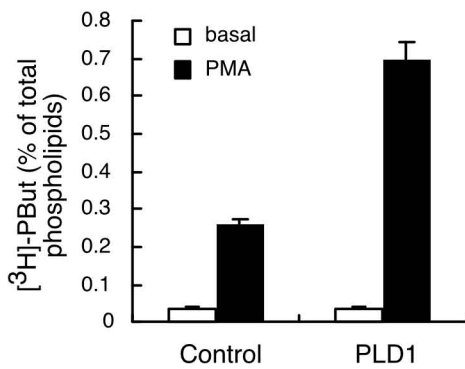

# Suppl. Fig. 3

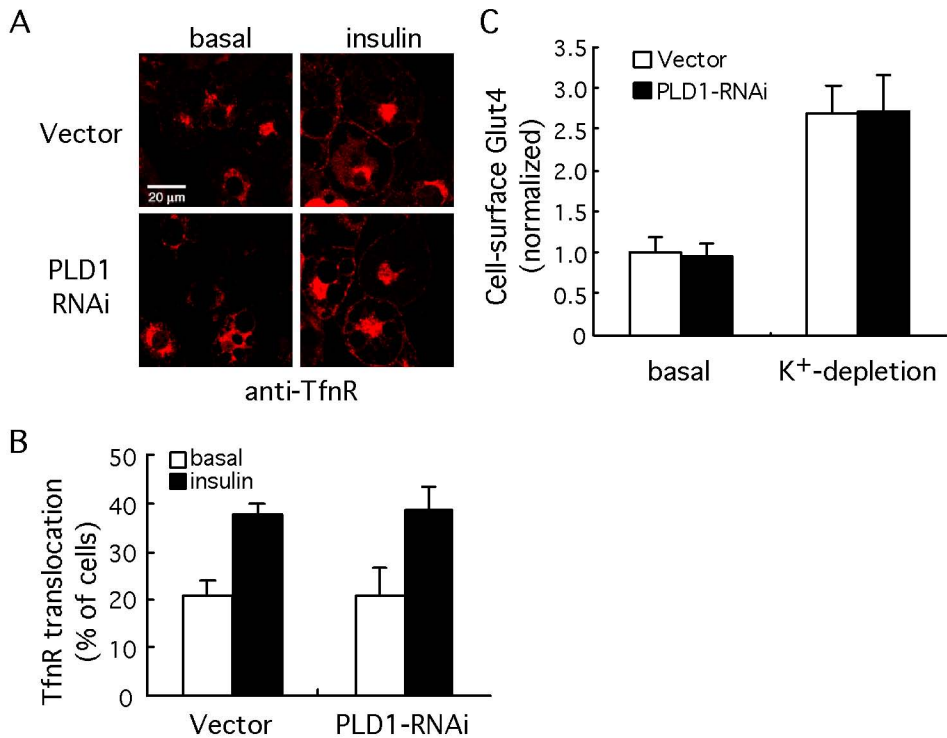

# Suppl. Fig. 4

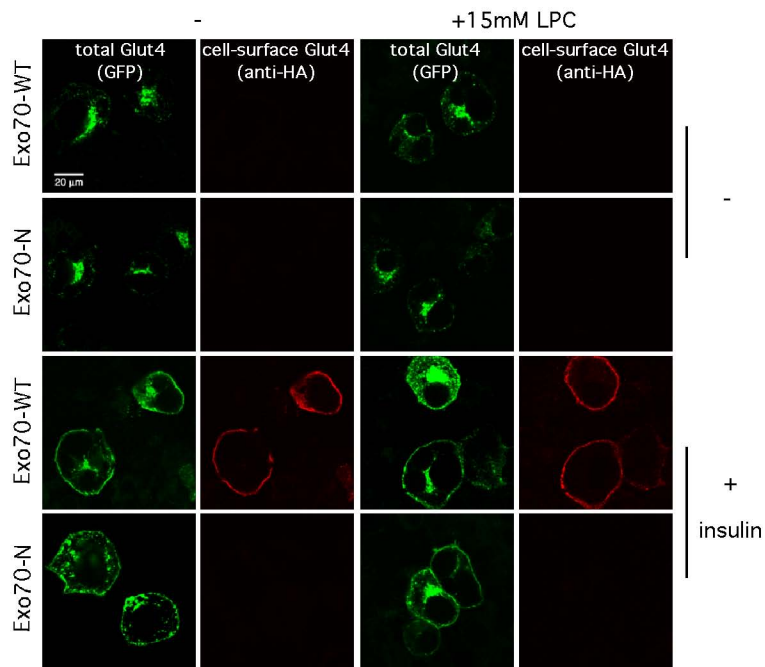

Supplement: mbc_E04-12-1124_1.pdf [file mbc_E04-12-1124_1.pdf]
